# Supplementary material
Source: publisher site journal article supplement (https://www.spandidos-publications.com/3739/downloadSupplementary)

Figure S1. The successful transfection of *miR-203* inhibitor and *miR-203* mimic in in hemangioma endothelial cells. Comparison of *miR-203* relative expression between miR (-) group compared with NC (-) group (A) and between miR (+) and NC (+) group. \*\*\* $P < 0.001$ . miR, microRNA; miR (-), cells transfected with *miR-203* inhibitor; NC (-), *miR-203* inhibitor NC; miR (+), cells transfected with the *miR-203* mimic; NC (+), negative control mimic; NS, not significant.

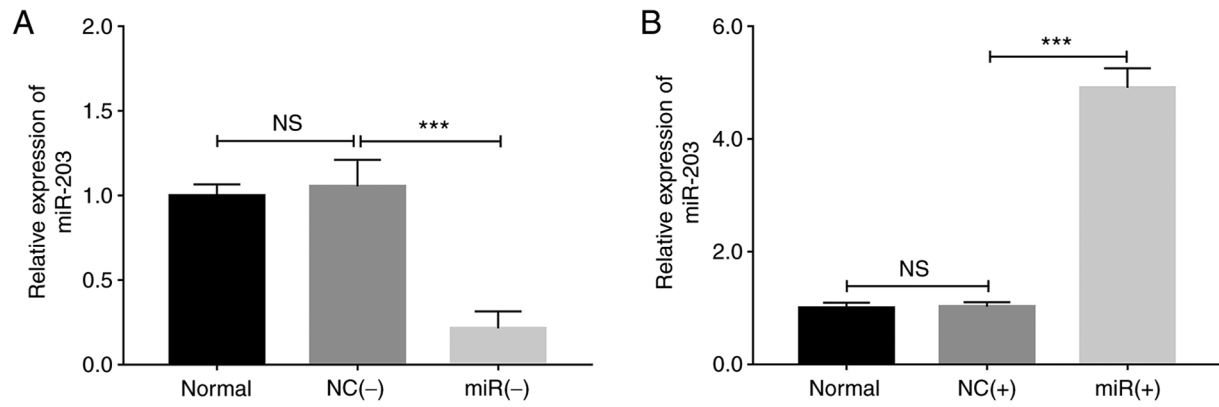

Supplement: Supplementary file 1 [file downloadSupplementary]
